# Supplementary material
Source: publisher site journal article supplement (https://www.dovepress.com/get_supplementary_file.php?f=369552.docx)
Supplement: Supplementary file 1 [file get_supplementary_file.php]

# Appendix

DKQ-specific education. The content of diabetes education in this study was developed based on the DKQ and categorized into the following sections:

Insulin and diabetes:

- Pancreas, not kidney, produces insulin.
- The usual cause of diabetes is lack of effective insulin in the body.
- In untreated diabetes, the amount of sugar in the blood usually increases.
- An insulin reaction is NOT caused by too much food.
- If I am a person with diabetes, my children have a higher chance of getting diabetes.
- There are two main types of diabetes: type 1 (insulin-dependent) and type 2 (non-insulin dependent).

Target value and diabetes treatment:

- Diabetes cannot be cured, but can be controlled.
- The best way to check my diabetes is by testing my blood (HbA1c), not the urine.
- A fasting blood sugar level of 210 is too high. The target value of fasting blood glucose is below 130 mg/dL.
- Medication, diet, and exercise are equally important to control my diabetes.
- The way I prepare my food is as important as the foods I eat.
- A diabetes diet consists mostly of “regular” food instead of “special” foods.
- Regular exercise will decrease the need for insulin or other diabetic medication.

Hypoglycemia:

- Shaking, sweating, dizziness, and feeling hungry are signs of low blood sugar.

Complications:

- Diabetes can damage my kidneys and eyes.
- Cardiovascular disease: People with diabetes are more likely to have heart disease or a stroke than people without diabetes (source: American Diabetes Association).
- Diabetes can cause loss of feeling in my hands, fingers, and feet.
- Diabetes often causes poor circulation.
- Cuts and abrasions on patients with diabetes heal more slowly.

Cut and Foot care:

- A person with diabetes should cleanse a cut with Normal saline and povidone-iodine. Do NOT use iodine and alcohol.
- A person with diabetes should take extra care when cutting the toenails.
- Tight elastic hose or socks are bad for a person with diabetes.

Hyperglycemia:

- Frequent urination, thirst, hunger, and weight loss are signs of high blood sugar.
